# Supplementary material
Source: publisher figshare collection journal article supplement (https://frontiersin.figshare.com/ndownloader/files/18088967)
Supplement: Supplementary file [file 18088967]

**S1 Table. Next-generation sequencing (NGS) of antibody repertoires of a ZIKV-infected Chinese patient.**

| A. Unbiased heavy and light chain repertoires obtained from 5'-RACE PCR and long-read NGS |                   |       |                    |               |                   |
|-------------------------------------------------------------------------------------------|-------------------|-------|--------------------|---------------|-------------------|
| Time point                                                                                | N <sub>read</sub> | Chain | N <sub>chain</sub> | <Length> (nt) | Usable (%)        |
|                                                                                           | 2,251,803 (H)     | H     | 1,778,286          | 577.3         | 1,168,643 (65.7%) |
| Day 4                                                                                     | 2,573,704 (κ+λ)   | κ     | 847,134            | 581.4         | 477,634 (56.4%)   |
|                                                                                           |                   | λ     | 1,129,678          | 616.0         | 684,407 (60.6%)   |
|                                                                                           | 2,903,255 (H)     | H     | 2,243,427          | 576.4         | 1,466,278 (65.4%) |
| Day 15                                                                                    | 2,422,687 (κ+λ)   | κ     | 945,850            | 613.4         | 526,669 (55.7%)   |
|                                                                                           |                   | λ     | 1,002,926          | 613.9         | 618,428 (61.7%)   |
|                                                                                           | 1,520,713 (H)     | H     | 1,301,551          | 586.7         | 907,084 (69.7%)   |
| Month 2                                                                                   | 1,893,984 (κ+λ)   | κ     | 740,365            | 606.0         | 455,337 (61.5%)   |
|                                                                                           |                   | λ     | 858,739            | 625.6         | 540,325 (62.9%)   |
|                                                                                           | 1,810,255 (H)     | H     | 1,505,394          | 565.4         | 1,008,904 (67.0%) |
| Month 3                                                                                   | 1,902,224 (κ+λ)   | κ     | 686,624            | 588.9         | 393,331 (57.3%)   |
|                                                                                           |                   | λ     | 829,831            | 614.9         | 512,005 (61.7%)   |
|                                                                                           | 2,035,707 (H)     | H     | 1,607,945          | 576.9         | 1,072,581 (66.7%) |
| Month 6                                                                                   | 1,838,536 (κ+λ)   | κ     | 750,002            | 604.5         | 414,641 (55.3%)   |
|                                                                                           |                   | λ     | 746,624            | 617.2         | 475,717 (63.7%)   |
|                                                                                           | 1,452,961 (H)     | H     | 1,292,264          | 576.8         | 919,669 (71.2%)   |
| Month 10                                                                                  | 1,356,757 (κ+λ)   | κ     | 484,221            | 604.1         | 306,232 (63.2%)   |
|                                                                                           |                   | λ     | 747,315            | 614.0         | 515,400 (69.0%)   |
|                                                                                           | 2,243,832 (H)     | H     | 1,722,355          | 560.6         | 1,121,665 (65.1%) |
| Month 12                                                                                  | 2,114,917 (κ+λ)   | κ     | 838,478            | 607.7         | 473,380 (56.5%)   |
|                                                                                           |                   | λ     | 911,970            | 622.4         | 564,912 (61.9%)   |
| B. ZK2B10 heavy chain repertoires obtained from gene-specific PCR and long-read NGS       |                   |       |                    |               |                   |
| Day 15                                                                                    | 2,903,024         | H     | 2,368,840          | 431.9         | 1,690,019 (71.3%) |
| Month 2                                                                                   | 3,526,417         | H     | 2,688,196          | 428.9         | 1,791,398 (66.6%) |
| Month 3                                                                                   | 4,200,005         | H     | 3,278,646          | 426.5         | 2,303,157 (70.2%) |
| Month 6                                                                                   | 3,696,344         | H     | 2,909,350          | 427.5         | 2,022,506 (69.5%) |

<sup>a</sup> Antibody library preparation was performed using previously reported PCR procedures, namely 5'-RACE PCR for unbiased repertoire analysis and gene-specific PCR for ZK2B10 lineage analysis. Human IgG/IgM reverse primers were used for library preparation, with sequencing performed on the Ion GeneStudio S5 platform using a 530 chip. Listed items include time point, total number of raw reads (heavy and light chains libraries were sequenced on two separate 530 chips), antibody chain type, number of confirmed antibody chains after germline gene assignment with a cutoff E-value of 10<sup>-3</sup>, average read length, and percentage of usable sequences after *Antibodyomics* pipeline processing and filtering with a cutoff of 250bp for variable gene alignment.
